# 1 **Redundancy in synaptic connections enables neurons to learn optimally**

2

3 Naoki Hiratani<sup>1,2\*</sup> and Tomoki Fukai<sup>1</sup>

4 <sup>1</sup>Laboratory for Neural Circuit Theory, RIKEN Brain Science Institute, Wako, Saitama, Japan,  
5 351-0198

6 <sup>2</sup>Gatsby Computational Neuroscience Unit, University College London, London, United  
7 Kingdom, W1T 4JG

8 \*corresponding: N.Hiratani@gmail.com

9

10 **Keywords:** synaptic plasticity, connectomics, dendritic computation

11

## 12 **Abstract**

13 Recent experimental studies suggest that, in cortical microcircuits of the mammalian brain,  
14 the majority of neuron-to-neuron connections are realized by multiple synapses. However,  
15 it is not known whether such redundant synaptic connections provide any functional benefit.  
16 Here, we show that redundant synaptic connections enable near-optimal learning in  
17 cooperation with synaptic rewiring. By constructing a simple dendritic neuron model, we  
18 demonstrate that with multisynaptic connections, synaptic plasticity approximates a  
19 sample-based Bayesian filtering algorithm known as particle filtering, and wiring plasticity  
20 implements its resampling process. The derived synaptic plasticity rule accounts for many  
21 experimental observations, including the dendritic position dependence of  
22 spike-timing-dependent plasticity. The proposed framework is applicable to detailed single  
23 neuron models, and also to recurrent circuit models. Our study provides a novel conceptual  
24 framework for synaptic plasticity and rewiring.

25

26

## 27 **Introduction**

28 Synaptic connection between neurons is the fundamental substrate for learning and  
29 computation in neural circuits. Previous morphological studies suggest that in cortical  
30 microcircuits, often several synaptic connections are found between the presynaptic axons

31 and the postsynaptic dendrites of two connected neurons (Deuchars et al., 1994; Markram  
32 et al., 1997; Feldmeyer et al., 1999). Recent connectomics studies confirmed these  
33 observations in somatosensory(Kasthuri et al., 2015) and visual(Lee et al., 2016) cortex,  
34 and also in hippocampus (Bartol et al., 2015). In particular, in barrel cortex, the average  
35 number of synapses per connection is estimated to be around 10(Markram et al., 2015).  
36 However, the functional importance of multisynaptic connections remains unknown.  
37 Especially, from a computational perspective, such redundancy in connection structure is  
38 potentially harmful for learning due to degeneracy (Watanabe, 2001; Amari et al., 2006). In  
39 this work, we study how neurons perform learning with multisynaptic connections and  
40 whether redundancy provides any benefit, from a Bayesian perspective.

41 Bayesian framework has been established as a candidate principle of information  
42 processing in the brain (Knill and Pouget, 2004; Körding and Wolpert, 2006). Many results  
43 further suggest that not only computation, but learning process is also near optimal in  
44 terms of Bayesian for given stream of information (Behrens et al., 2007; Lake et al., 2015;  
45 Madarasz et al., 2016), yet its underlying plasticity mechanism remains largely elusive.  
46 Previous theoretical studies revealed that Hebbian-type plasticity rules eventually enable  
47 neural circuits to perform optimal computation under appropriate normalization (Soltani  
48 and Wang, 2010; Nessler et al., 2013). However, these rules are not optimal in terms of  
49 learning, so that the learning rates are typically too slow to perform learning from a limited  
50 number of observations. Recently, some learning rules are proposed for rapid learning  
51 (Aitchison and Latham, 2014; Gütig, 2016), yet their biological plausibility are still  
52 disputable. Here, we propose a novel framework of non-parametric near-optimal learning  
53 using multisynaptic connections. We show that neurons can exploit the variability among  
54 synapses in a multisynaptic connection to accurately estimate the causal relationship  
55 between pre- and postsynaptic activity. The learning rule is first derived for a simple neuron  
56 model, and then implemented in a detailed single neuron model. The derived rule is  
57 consistent with many known properties of dendritic plasticity and synaptic organization.  
58 Furthermore, the model reveals potential functional roles of anti-Hebbian synaptic plasticity  
59 observed in distal dendrites (Letzkus et al., 2006; Sjöström and Häusser, 2006), and  
60 benefits of task-dependent dendritic synaptogenesis (Yang et al., 2009; Xu et al., 2009).

## 61 **Results**

### 62 *A conceptual model of learning with multisynaptic connections*

63 Let us first consider a model of two neurons connected with  $K$  numbers of synapses (Fig. 1A)  
64 to illustrate the concept of the proposed framework. In the model, synaptic connections  
65 from the presynaptic neuron are distributed on the dendritic tree of the postsynaptic neuron  
66 as observed in experiments (Markram et al., 1997; Feldmeyer et al., 1999). Although a  
67 cortical neuron receives synaptic inputs from several thousands of presynaptic neurons in  
68 reality, here we consider the simplified model to illustrate the conceptual novelty of the  
69 proposed framework. More realistic models will be studied in following sections.

70 The synapses generate different amplitudes of excitatory postsynaptic potentials  
71 at the soma mainly through two mechanisms. First, the amplitude of dendritic attenuation  
72 varies from synapse to synapse, because the distances from the soma are different (Stuart  
73 and Spruston, 1998; Segev and London, 2000). Let us denote this dendritic position  
74 dependence of synapse  $k$  as  $v_k$ , and call it as the unit EPSP, because  $v_k$  corresponds to the  
75 somatic potential caused by a unit conductance change at the synapse (i.e. somatic EPSP per  
76 AMPA receptor). As depicted in Figure 1A, unit EPSP  $v_k$  takes a small (large) value on a  
77 synapse at a distal (proximal) position on the dendrite. The second factor is the amount of  
78 AMPA receptors in the corresponding spine, which is approximately proportional to its spine  
79 size (Matsuzaki et al., 2004). If we denote this spine size factor as  $g_k$ , the somatic EPSP  
80 caused by a synaptic input through synapse  $k$  is written as  $w_k = g_k v_k$ . This means that even if  
81 the synaptic contact is made at a distal dendrite (i.e. even if  $v_k$  is small), if the spine size  $g_k$  is  
82 large, a synaptic input through synapse  $k$  has a strong impact at the soma (e.g. red synapse  
83 in Fig. 1A) or vice versa (e.g. cyan synapse in Fig. 1A).

84

85

86

87

88

89

90

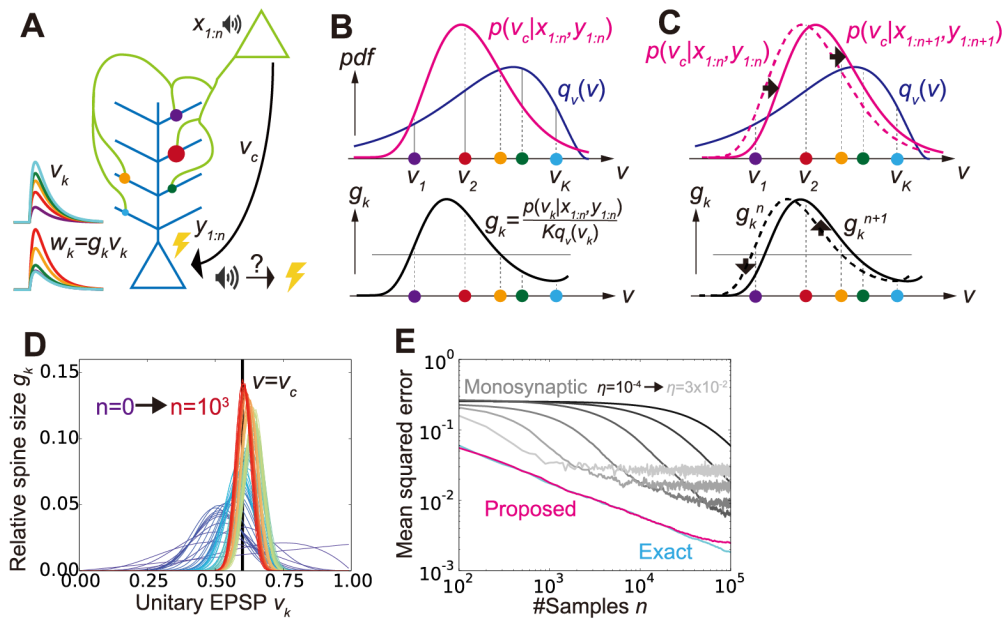

91

92 **Figure 1. A conceptual model of multisynaptic learning**

93 **A)** Schematic figure of the model consist of two neurons connected with  $K$  synapses. Curves  
 94 on the left represent unit EPSP  $v_k$  (top) and the weighted EPSP  $w_k = g_k v_k$  (bottom) of each  
 95 synaptic connection. Note that synapses are consistently colored throughout Figure 1 and 2.  
 96 **B)** Schematics of non-parametric representation of the probability distribution by  
 97 multisynaptic connections. In both graphs, x-axes are unit EPSP, and the left (right)  
 98 corresponds to distal (proximal) dendrite. The mean over the true distribution  $p(v_c | x_{1:n}, y_{1:n})$   
 99 can be approximately calculated by taking samples (i.e. synapses) from the unit EPSP  
 100 distribution  $q_v(v)$  (top), and then taking a weighted sum over the spine size factor  $g_k$   
 101 representing the ratio  $p(v_c | x_{1:n}, y_{1:n}) / q_v(v)$  (bottom). **C)** Illustration of synaptic weight  
 102 updating. When the distribution  $p(v_c | x_{1:n+1}, y_{1:n+1})$  comes to the right side of the original  
 103 distribution  $p(v_c | x_{1:n}, y_{1:n})$ , a synaptic weight  $g_k^{n+1}$  become larger (smaller) than  $g_k^n$  at  
 104 proximal (distal) synapses. **D)** An example of learning dynamics at  $K=100$  and  $q_v(v)=\text{const}$ .  
 105 Each curve represents the distribution of relative spine size  $\{g_k\}$ , and the colors represent the  
 106 growth of trial number. **E)** Comparison of performance among the proposed method, the  
 107 monosynaptic rule, and the exact solution (see *A conceptual model of multisynaptic*  
 108 *learning* in Methods for details). The monosynaptic learning rule was implemented with  
 109  $\eta=10^{-4}, 3 \times 10^{-4}, 10^{-3}, 3 \times 10^{-3}, 10^{-2}, 3 \times 10^{-2}$ , and the initial value was taken as  $v_{rm}^0 = 1/2$ . Lines  
 110 were calculated by taking average over 100 independent simulations.

111

112

113 On this model, we consider a simplified fear-conditioning task as an example. Here,  
114 the presynaptic neuron activity represents a tone stimulus ( $x_n \in \{0,1\}$ ), and the postsynaptic  
115 neuron activity represents an electric shock ( $y_n \in \{0,1\}$ ), where  $x_n=1$  ( $y_n=1$ ) denotes the  
116 presence of the tone (shock), and subscript  $n$  stands for the trial number (Fig. 1A). In order  
117 to invoke appropriate fear responses, synaptic connections need to acquire the probability  
118 of the shock given the tone  $v_c \equiv p(y_n=1 | x_n=1)$  (Madarasz et al., 2016). Below, we consider  
119 supervised learning of this parameter  $v_c$  by multisynaptic connections, from the tone and the  
120 shock stimuli represented by pre and postsynaptic activities respectively. From finite trials  
121 up to  $n$ , this conditional probability is estimated as  $\bar{v}_c^n = \int v'_c p(v'_c | x_{1:n}, y_{1:n}) dv'_c$ , where  
122  $x_{1:n} = \{x_1, x_2, \dots, x_n\}$  and  $y_{1:n} = \{y_1, y_2, \dots, y_n\}$  are the histories of input and output activities  
123 respectively, and  $p(v_c | x_{1:n}, y_{1:n})$  is the probability distribution of the hidden parameter  $v_c$   
124 after  $n$  trials. Importantly, in general, it is impossible to get the optimal estimation of  $\bar{v}_c^{n+1}$   
125 directly from  $\bar{v}_c^n$ , because in order to calculate  $\bar{v}_c^{n+1} = \int v'_c p(v'_c | x_{1:n+1}, y_{1:n+1}) dv'_c$ , one first needs to  
126 calculate the distribution  $p(v_c | x_{1:n+1}, y_{1:n+1})$  by integrating the previous distribution  
127  $p(v_c | x_{1:n}, y_{1:n})$  and the new observation at trial  $n+1$ :  $\{x_{n+1}, y_{n+1}\}$ . This means that for  
128 near-optimal learning, synaptic connections need to learn and represent the distribution  
129  $p(v_c | x_{1:n}, y_{1:n})$  instead of the point estimation  $\bar{v}_c^n$ . But, how can synapses achieve that? The  
130 key hypothesis of this paper is that redundancy in synaptic connections is the substrate for  
131 the non-parametric representation of this probabilistic distribution. Below, we show that  
132 dendritic summation over multisynaptic connections yields the optimal estimation from the  
133 given distribution  $p(v_c | x_{1:n}, y_{1:n})$ , and dendritic-position-dependent Hebbian synaptic  
134 plasticity updates this distribution.

135

### 136 *Dendritic summation as importance sampling*

137 We first consider how dendritic summation achieves the calculation of the mean conditional  
138 probability  $\bar{v}_c^n = \int v'_c p(v'_c | x_{1:n}, y_{1:n}) dv'_c$ . It is generally difficult to evaluate this integral by directly  
139 taking samples from the distribution  $p(v_c | x_{1:n}, y_{1:n})$  in a biologically plausible way, because  
140 the cumulative distribution changes its shape at every trial. Nevertheless, we can still  
141 estimate the mean value by using an alternative distribution as the proposal distribution,  
142 and taking weighted samples from it. This method is called importance sampling (Robert and

143 Casella, 2013). In particular, here we can use the unit EPSP distribution  $q_v(v)$  as the proposal  
 144 distribution, because unit EPSPs  $\{v_k\}$  of synaptic connections can be interpreted as samples  
 145 depicted from the unit EPSP distribution (Fig. 1B top). Thus, the mean  $\bar{v}_c^n$  is approximately  
 146 calculated as

$$147 \quad \bar{v}_c^n = \int v'_c p(v'_c | x_{t_n}, y_{t_n}) dv'_c \approx \frac{1}{K} \sum_{k=1}^K \frac{p(v_c = v_k | x_{t_n}, y_{t_n})}{q_v(v_k)} v_k = \sum_k g_k^n v_k = \sum_k w_k^n, \quad (1)$$

148 where  $g_k^n = \frac{p(v_c = v_k | x_{t_n}, y_{t_n})}{K q_v(v_k)}$ . Therefore, if spine size  $g_k^n$  represents the relative weight of  
 149 sample  $v_k$ , then dendritic summation over postsynaptic potentials  $w_k^n \equiv g_k^n v_k$  naturally  
 150 represents the desired value ( $\bar{v}_c^n \approx \sum_k w_k^n$ ). For instance, if the distribution of synapses is  
 151 biased toward proximal side (i.e. if the mean  $\bar{v}_c^n$  is overestimated by the distribution of unit  
 152 EPSPs as in Fig. 1B top), then synapses at distal dendrites should possess large spine sizes,  
 153 while the spine sizes of proximal synapses should be smaller (Fig. 1B bottom).

154

### 155 *Synaptic plasticity as particle filtering*

156 In the previous section, we showed that redundant synaptic connections can represent  
 157 probabilistic distribution  $p(v_c = v_k | x_{1:n}, y_{1:n})$ , if spine sizes  $\{g_k\}$  coincide with their importance

158  $g_k^n = \frac{p(v_c = v_k | x_{t_n}, y_{t_n})}{K q_v(v_k)}$ . But, how can synapses update their representation of the probabilistic

159 distribution  $p(v_c = v_k | x_{1:n}, y_{1:n})$  based on a new observation  $\{x_{n+1}, y_{n+1}\}$ ? Because  
 160  $p(v_c = v_k | x_{1:n}, y_{1:n})$  is mapped onto a set of spine sizes  $\{g_k^n\}$  as in Equation 1, the update of the  
 161 estimated distribution  $p(v_k | x_{t_n}, y_{t_n}) \rightarrow p(v_k | x_{t_{n+1}}, y_{t_{n+1}})$  can be performed by the update of  
 162 spine sizes  $\{g_k^n\} \rightarrow \{g_k^{n+1}\}$ . By considering particle filtering(Doucet et al., 2000) on the  
 163 parameter space (see *The learning rule for multisynaptic connections* in Methods for details),  
 164 we can derive the learning rule for spine size as

$$165 \quad g_k^{n+1} = \frac{1 + f(x_{n+1}, y_{n+1}; v_k)}{1 + f(x_{n+1}, y_{n+1}; w^n)} g_k^n, \quad f(x, y; v) \equiv (2v - 1)x(2y - 1). \quad (2)$$

166 This rule is primary Hebbian, because the weight change depends on the product of pre and  
 167 postsynaptic activity  $x_{n+1}$  and  $y_{n+1}$ . In addition to that, the change also depends on unit EPSP  
 168  $v_k$ . This dependence on unit EPSP reflects the dendritic position dependence of synaptic  
 169 plasticity. In particular, for a distal synapse (i.e. for small  $v_k$ ), the position-dependent term

170  $(2v_k-1)$  takes a negative value (note that  $0 \leq v_k < 1$ ), thus yielding an anti-Hebbian rule as  
171 observed in neocortical synapses (Letzkus et al., 2006; Sjöström and Häusser, 2006).

172 For instance, if the new data  $\{x_{n+1}, y_{n+1}\}$  indicates that the value of  $v_c$  is in fact larger  
173 then previously estimated, then the distribution  $p(v_c | x_{1:n+1}, y_{1:n+1})$  shifts to the right side  
174 (upper panel of Fig. 1C). This means that the spine size  $g_k^{n+1}$  becomes larger than  $g_k^n$  at  
175 synapses on the right side (i.e. proximal side), whereas synapses get smaller on the left side  
176 (i.e. distal side; bottom panel of Fig. 1C). Therefore, pre- and postsynaptic activity causes  
177 LTP at proximal synapses induces LTD at distal synapses as observed in experiments  
178 (Letzkus et al., 2006; Sjöström and Häusser, 2006). The derived learning rule (Eq. 2) also  
179 depends on the total EPSP amplitude  $w^n \equiv \sum_k w_k^n \equiv \sum_k g_k^n v_k$ . This term reflects a normalization  
180 factor possibly modulated through redistribution of synaptic vesicles over the presynaptic  
181 axon (Staras et al., 2010).

182 We performed simulations by assuming a uniform spatial distribution for synapses;  
183  $g_k(v) = \text{const.}$  At an initial phase of learning, the distribution of spine size  $\{g_k^n\}$  has a broad  
184 shape (purple lines in Fig. 1D), whereas the distribution gets skewed as evidence is  
185 accumulated through stochastic pre- and postsynaptic activities (red lines in Fig. 1D).  
186 Indeed, the estimation performance of the proposed method is nearly the same as that of  
187 the exact optimal estimation, and much better than that of the standard monosynaptic  
188 learning rule (Fig. 1E; see *Monosynaptic learning rule* in Methods for details).

189

### 190 *Synaptogenesis as resampling*

191 As shown above, weight modification in multisynaptic connections enables a near optimal  
192 learning. However, to represent the distribution accurately, many synaptic connections are  
193 required (gray line in Fig. 2B), while the number of synapses between a excitatory neuron  
194 pair is typically less than 10 in the cortical microcircuits. Moreover, even if many synapses  
195 are allocated between presynaptic and postsynaptic neurons, if the unit EPSP distribution is  
196 highly biased, the estimation is poorly performed (gray line in Fig. 2C). We next show that  
197 this problem can be avoided by introducing synaptogenesis (Holtmaat and Svoboda, 2009)  
198 into the learning rule.

199

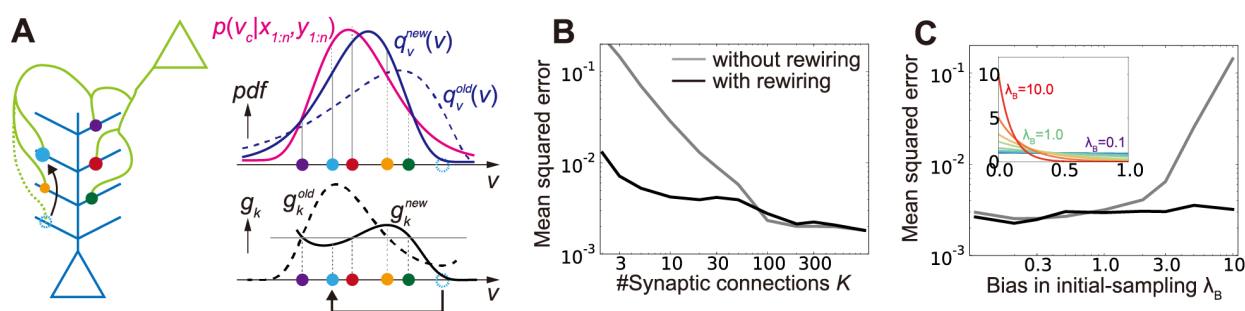

200 **Figure 2. Synaptic rewiring for efficient learning**

201 **A)** Schematic illustration of resampling. Dotted cyan circles represent an eliminated synapse,  
 202 and the filled cyan circles represent a newly created synapse. **B, C)** Comparison of  
 203 performance with/without synaptic rewiring at various synaptic multiplicity  $K$  (**B**), and  
 204 bias in initial-sampling  $\lambda_B$  (**C**). For each bias parameter  $\lambda_B$ , the unit EPSP distribution  $\{v_k\}$  was set  
 205 as  $v_{k'} = -\log(1 - [1 - e^{-\lambda_B}] \frac{k'}{K})$ , as depicted in the inset. Lines are the means over 100 simulations.

206

207

208 In the proposed framework, when synaptic connections are fixed (i.e. when  $\{v_k\}$  are  
 209 fixed), some synapses quickly become useless for representing the distribution. For  
 210 instance, in Figure 2A, (dotted) cyan synapse is too proximal to contribute for the  
 211 representation of  $p(v_c|x,y)$ . Therefore, by removing the cyan synapse and creating a new  
 212 synapse at a random site, on average, the representation becomes more effective (Fig. 2A).  
 213 Importantly, in our framework, synaptic weight is proportional to its informatic importance  
 214 by definition, thus optimal rewiring is achievable simply by removing the synapse with the  
 215 smallest spine size. Ideally, the new synapse should be sampled from  $p(v_c|x,y)$  for an  
 216 efficient rewiring, but random creation is more biologically plausible (Holtmaat and Svoboda,  
 217 2009), and indeed sufficient as long as elimination is selectively performed as mentioned  
 218 above (see also Hiratani and Fukai, 2016).

219 By introducing this resampling process, the model is able to achieve high  
 220 performance even if the total number of synaptic connection is just around three (black line  
 221 in Fig. 2B), or if the initial distribution of  $\{v_k\}$  is poorly taken (black line in Fig. 2C).

222



223 *Detailed single neuron model of learning from many presynaptic neurons*

224 In the previous sections, we found that synaptic plasticity in multisynaptic connections can  
225 achieve non-parametric near-optimal learning in a simple model with one presynaptic  
226 neuron. To investigate its biological plausibility, we next extend the proposed framework to  
227 a detailed single neuron model receiving inputs from many presynaptic neurons. To this end,  
228 we constructed an active dendritic model using NEURON simulator(Hines and Carnevale,  
229 1997) based on a previous model of a pyramidal neuron in the layer 2/3 (Smith et al., 2013).  
230 We randomly distributed 500 excitatory synaptic inputs from 50 presynaptic neurons on the  
231 dendritic tree of the postsynaptic neuron, while fixing synaptic connections per presynaptic  
232 neuron at  $K=10$  (Fig. 3A; see *Morphology* in Methods for the details of the model). First, we  
233 added a small constant conductance for each synapse, and then measured the somatic  
234 potential change, which corresponds to unit EPSP in the model. As observed in cortical  
235 neurons(Stuart and Spruston, 1998), inputs at distal dendrite tended to show large  
236 attenuation at the soma, though variability was quite high (Fig. 3B). The calculated unit EPSP  
237 distribution was rather skewed, because more branches were located on distal dendrites (Fig.  
238 3C top). From this distribution, we set the initial weight distribution accordingly (Fig. 3C  
239 bottom), as described in Figure 1B.

240 On this model, we considered a supervised classification task: the neuron should  
241 fire if the stochastic presynaptic spikes are generated from the target pattern not from a  
242 distractor (Fig. 3D). The supervised signal was stochastically given if the generate  
243 presynaptic spike pattern resembled the target pattern (see *Classification task* in Methods).  
244 We first applied the proposed synaptic plasticity rule without rewiring(see *The learning rule*  
245 *for the detailed model* in Methods). After a sufficient number of trials, indeed, the neuron  
246 learned to show large depolarization only for the target pattern not for distractors (Fig. 3E).  
247 Classification performance was better when EPSP was decoded from its height, compared to  
248 the decoding from the total EPSP area (Fig. 3F), suggesting an advantage of spike-based  
249 information processing with a threshold mechanism.

250

251

252

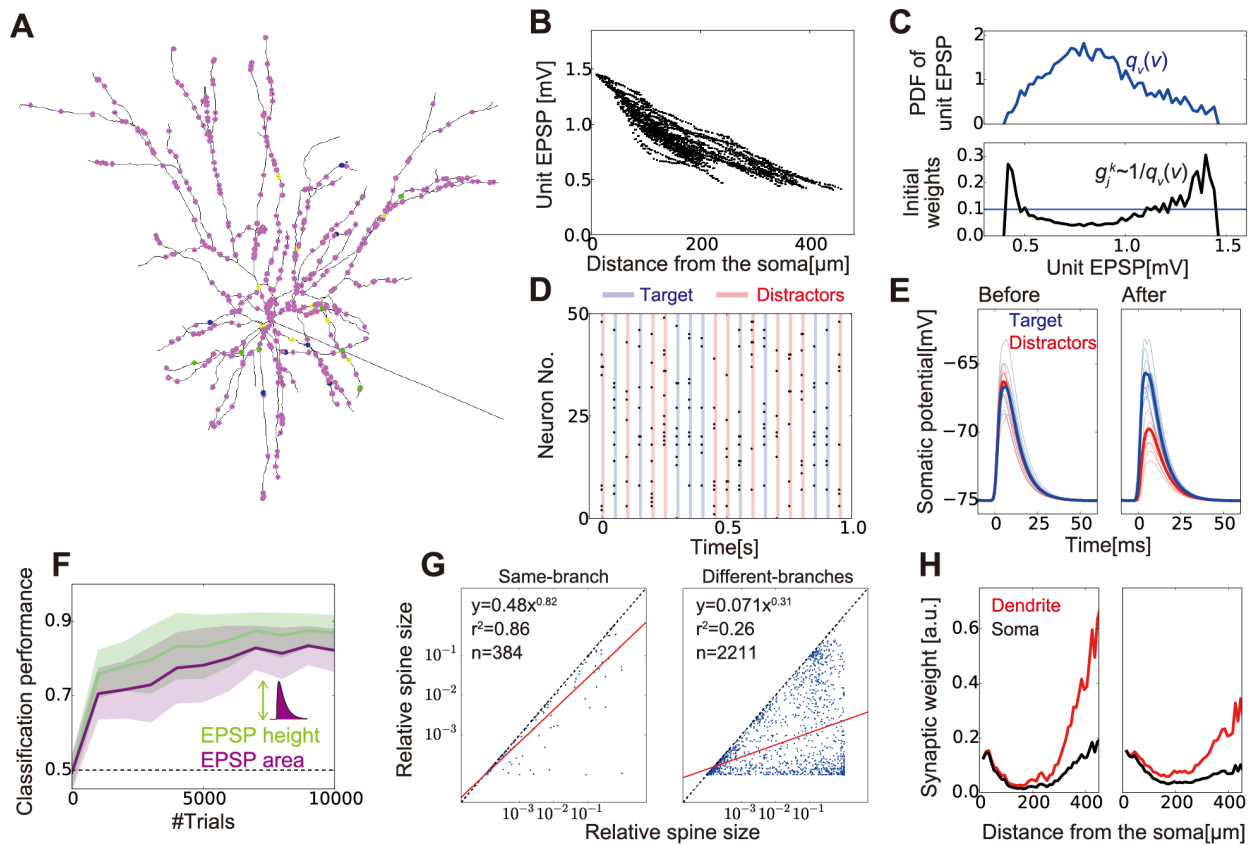

253

254 **Figure 3. A detailed model of multisynaptic learning with multiple presynaptic neurons**

255 **A)** Schematic figure of the detailed neuron model. Colored points on the dendritic trees

256 represent 500 synaptic inputs from 50 presynaptic neurons. Green, yellow, and blue points

257 show examples of initial distributions of inputs from three presynaptic neurons. **B)**

258 Dendritic position dependence of unit EPSP. Each black dot represents a synaptic contact on

259 the dendritic tree. **C)** Unit EPSP distribution (top) and the corresponding initial weights

260 distribution (bottom) for the detailed neuron model. This figure corresponds to Figure 1B.

261 **D)** Examples of input spike trains generated from the target and distractor stimuli. Vertical

262 bars indicate each stimulation trial. Note that in the actual simulations, variables were

263 initialized after each stimulation trial. See *Classification task* in Methods for details of the

264 task configuration. **E)** Somatic membrane dynamics before and after learning. Thick lines

265 represent the average response curves over 100 trials, and thin lines are trial-by-trial

266 responses. **F)** The learning curves calculated from peak EPSP height (light-green line) and

267 EPSP area (purple line). Error bars represent the standard derivations calculated over 50

268 simulations. **G)** Correlations of relative spine sizes between two synapses projected from the

269 same presynaptic neuron onto the same dendritic branch (left), and onto different dendritic

270 branches (right). Branches longer than 40 $\mu$ m were excluded from the analysis. **H)** Mean

271 distribution of the relative strength of synapse at its dendritic position  $g_k$  (red) and at the  
272 soma  $g_k v_k / v_{max}$  (black). In the left panel, we used  $\alpha_B=0.2$  as in the rest of the figures, while in  
273 the right panel, we used  $\alpha_B=0.6$  to reproduce a less sparse input configuration (see *Input*  
274 *configuration* in Methods for details).

---

275

276

277 We further investigated consistency with experimental results. As observed in  
278 hippocampal neurons (Bartol et al., 2015), when two synaptic connections were made from  
279 the same presynaptic neuron to the same dendritic branch, their spine sizes were highly  
280 correlated (Fig. 3G left). In contrast, if synapses were connected to different branches of the  
281 postsynaptic neuron, spine size correlation vanished almost completely (Fig. 3G right).  
282 Furthermore, it is known that distal synaptic connections tend to have larger spine sizes  
283 than proximal connections, so that their somatic impacts are nearly the same with proximal  
284 synapses in hippocampus, and somewhat smaller in neocortex (Williams and Stuart, 2003).  
285 Our model replicated this correlation between the average spine size and the dendritic  
286 position (Fig. 3H) due to sparse stimulus representation used in the model. In addition, we  
287 found that under a denser stimulus representation, the average spine size of distal synapses  
288 became smaller, resulting in a spine size distribution closer to that of cortical neurons than  
289 of hippocampal neurons (Fig. 3H right compared to the left). This result is consistent with  
290 experimental observations of non-sparse selectivity at cortical pyramidal neurons (Rigotti et  
291 al., 2013).

292 We next changed the shape of distribution of synapses on dendritic tree. As  
293 expected, when synapses are biased toward the distal side, the performance improved  
294 faster than the opposite case, because the unit EPSP distribution provides a better prior  
295 distribution of optimal EPSPs (Fig. 4A). However, the performance after a long training was  
296 better when the distribution was skewed toward the proximal side (Fig. 4A), because strong  
297 signals are better represented when most synapses are proximal.

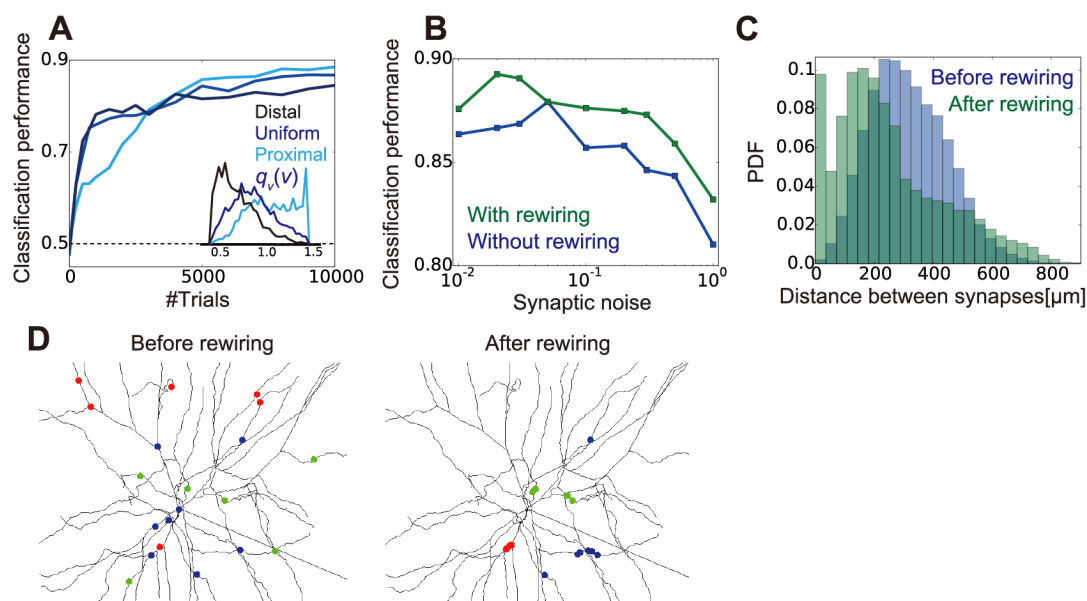

298

299 **Figure 4. Effects of dendritic synaptic distribution and rewiring in the detailed model**  
 300 **A)** Learning curves for different synaptic distributions generated from three values of biased  
 301 parameter:  $\lambda_B=0.1, 1.0, 1.9$  (from light blue to black). Note that blue line in the center  
 302 corresponds to the light-green line in Figure 3F. The inset represents the unit EPSP  
 303 distributions in the three settings. **B)** Classification performance after 10000 trials with or  
 304 without rewiring at various synaptic noise levels. **C)** Distributions of distance along the  
 305 dendrite between two synapses projected from the same presynaptic neuron before (blue)  
 306 and after (green) 10000 trials of rewiring. **D)** Effect of synaptic rewiring on the dendritic  
 307 distributions of synapses from the same presynaptic neuron. 30 synaptic contacts from 3  
 308 representative presynaptic neurons (color-coded) are depicted. In **B-D**, resampling  
 309 threshold was set at  $g_{th}=0.0001$ , and the potential location of newly created spines were  
 310 limited to the dendritic branches to which the corresponding presynaptic neuron initially  
 311 projected, because typically presynaptic axons and postsynaptic dendrites have a limited  
 312 number of close contacts (see *Details of the NEURON simulations* in Methods for details of  
 313 rewiring). All data points in **A-C** were calculated by taking average over 50 independent  
 314 simulations.

315

316

317 Finally, we investigated effects of synaptic rewiring. Here we introduced synaptic  
 318 noise that reflects stochastic signal transmission at individual synapses (see *Details of the*  
 319 *NEURON simulations* in Methods). Although rewiring did not improve performance much

320 except in the regime of high synaptic noise (Fig. 4B), we found that the rewiring causes  
321 clustering of synapses from the same presynaptic neuron (Fig. 4D), and reduces the mean  
322 dendritic distance between two synapses projected from the same presynaptic neuron (Fig.  
323 4C). This result suggests that the clustering of synaptic contacts made by the same  
324 presynaptic neuron observed in adult neocortex (Kasthuri et al., 2015; Lee et al., 2016)  
325 could be the result of developmental synaptogenesis.

326

### 327 *Recurrent circuit model of unsupervised learning*

328 Results so far demonstrated that the proposed learning rule works efficiently in supervised  
329 learning tasks. However, supervised signals are often not available in the actual brain. Hence,  
330 we next show that the proposed framework is also applicable for unsupervised learning in  
331 recurrent networks in which lateral interactions enable self-organized learning. Let us  
332 consider acquisition of stochastic sequences by mutually connected firing-rate units (Fig.  
333 5A). In the model, external states are updated according to a hidden Markov model (Fig. 5A  
334 top). The chosen state is observed and represented stochastically by a layer of binary units  
335 (Fig. 5A middle), and then their outputs project to the recurrent network (Fig. 5A bottom).  
336 Here, we used an all-to-all recurrent network in which each neuron-to-neuron connection  
337 is realized by five synapses. The task is to infer both parameters and states of the hidden  
338 Markov process from a given sequence of observations. On this task, we implemented our  
339 multisynaptic learning rule, as well as previously proposed rules (Rabiner, 1989; Mongillo  
340 and Deneve, 2008) for comparison (see *Recurrent circuit model* in Methods for details).

341 Although the learning performance of the proposed rule was not as good as that of  
342 the batch EM algorithm (Rabiner, 1989) due to lack of memory, still the proposed rule  
343 performed better than a stochastic gradient descent (SGD) rule during the most epochs of  
344 learning (Fig. 5B). A virtue of the proposed rule is that it does not require fine-tuning of  
345 learning rate unlike SGD learning, or online EM algorithm (Mongillo and Deneve, 2008)(Fig.  
346 5C).

347

348

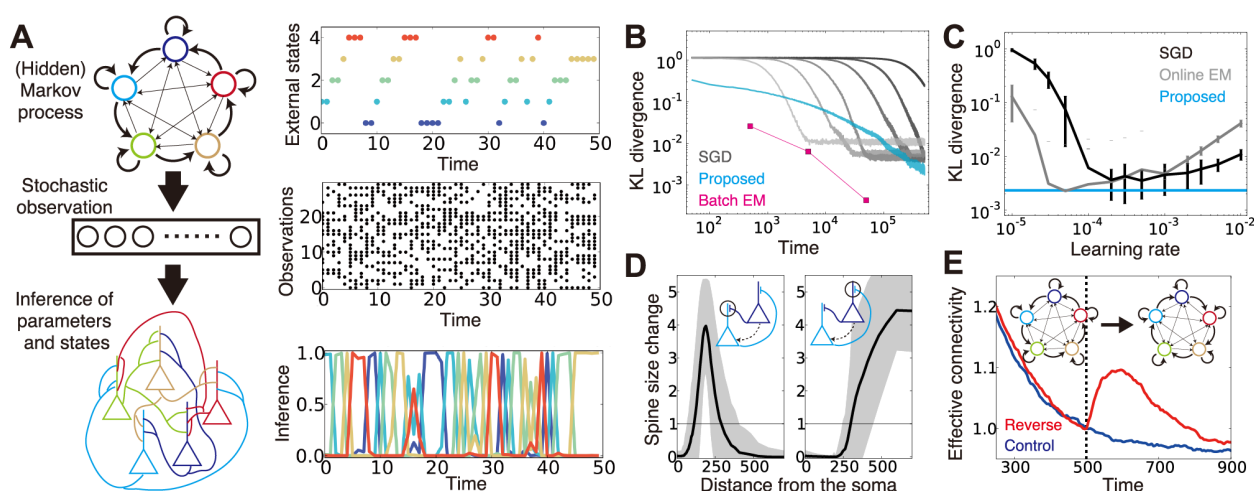

349

350 **Figure 5. Unsupervised learning of probabilistic sequences by a recurrent network**  
 351 **with multisynaptic connections**

352 **A)** Schematic illustration of the model organization (left) and examples of model behaviors  
 353 (right). External states generated from a hidden Markov model (top) are observed by  
 354 stochastic binary units (middle), which in turn projected to a recurrent circuit in which every  
 355 unit pair is connected with five synapses (bottom). **B, C)** Performance comparisons of the  
 356 model and other methods at different times (trial numbers)(**B**) and learning rates(**C**). In **C**, KL  
 357 divergence were calculated at  $t=5 \times 10^5$ , and error bars are standard deviations calculated  
 358 over trials. **D)** Relationship between spine size change and the distance from the soma, at a  
 359 synapse where presynaptic input and postsynaptic firing having strong causal relationship  
 360 (left), or anti-causal relationship (right). Here, rewiring was turned off to observe the pure  
 361 effect of synaptic plasticity alone. Spine sizes were calculated at  $t=2500$ , and the distance  
 362 from the soma was artificially determined by setting the characteristic length as  $200 \mu\text{m}$ . **E)**  
 363 The influence of retraining on effective connectivity. We changed the hidden Markov process  
 364 from a counter-clockwise dynamics to clockwise dynamics after 500 trials (inset). The  
 365 effective connectivity was calculated by discarding the silent synapses with spine size  $g_k <$   
 366  $0.01$ . Averages were taken over 50 (**B, C**), and 5000 (**D,E**) simulations. In **D** and **E**, the  
 367 feedforward projections were fixed, and only the recurrent connections were learned. See  
 368 *Recurrent circuit model* in Methods for further details.

369

370

371

372

373 We further looked into correspondence with the experimental results. In  
374 burst-dependent STDP, distal synapses show an anti-Hebbian STDP time window, while  
375 proximal synapses show the ordinary Hebbian STDP time window (Letzkus et al., 2006).  
376 Correspondingly, in the model, when the pre- and postsynaptic neurons had causal  
377 relationship, synapses on proximal dendrites were more likely potentiated compared to  
378 distal synapses (Fig. 5D left). This was because large unit EPSPs (i.e. proximal synapses) are  
379 preferred when the total synaptic weight should be large. In contrast, when two neurons had  
380 an anti-causal relationship, distal synapses were more likely potentiated (Fig. 5D right).  
381 Secondly, it is known that novel training increases the observed number of spines in  
382 task-related neurons (Yang et al., 2009; Xu et al., 2009). We forced novel learning on the  
383 network model by reversing the order of transitions among hidden states (Fig. 5E inset). Our  
384 model showed a similar increase in the number of effective connectivity right after the  
385 changes in the external environment (Fig. 5E). This is because, when the input structure  
386 changes due to novel training, the distributions of possible parameter values become  
387 broader, as a result, previously silent synapses are employed for representing these wider  
388 probabilistic distributions.

389

## 390 Discussion

391 In this work, first we have used a simple conceptual model to show: (i) Multisynaptic  
392 connections provide a non-parametric representation of probabilistic distribution of the  
393 hidden parameter using redundancy in synaptic connections (Fig. 1AB); (ii) Updating of  
394 probabilistic distribution given new inputs can be performed by a Hebbian-type synaptic  
395 plasticity when the output activity is supervised (Fig. 1C-E); (iii) Elimination and creation of  
396 spines is crucial for efficient representation and fast learning (Fig. 2A-C). In short, synaptic  
397 plasticity and rewiring at multisynaptic connections naturally implements an efficient  
398 sample-based Bayesian filtering algorithm. Secondly, we have demonstrated that the  
399 proposed multisynaptic learning rule works well in a detailed single neuron model receiving  
400 stochastic spikes from many neurons (Fig. 3). Moreover, the model suggests that the  
401 dendritic distribution of multisynaptic inputs provides a prior distribution of the expected  
402 synaptic weight (Fig. 4A), and rewiring of synaptic connection supports robust information

403 processing under synaptic noise (Fig. 4B). We have further extended the framework for  
404 unsupervised learning in recurrent circuits (Fig. 5A–C), and then shown that the model  
405 reproduces the experimentally known dendritic position dependences of plasticity,  
406 including anti-Hebbian plasticity at distal dendrites (Fig. 5D).

407

#### 408 *Distribution of multisynaptic projections*

409 Our study provides several experimentally testable predictions on dendritic synaptic  
410 plasticity, and the resultant synaptic distribution. First, the model suggests developmental  
411 convergence of synaptic connections from each presynaptic neuron (Fig. 4CD). It is indeed  
412 known that in adult cortex, synaptic connections from the same presynaptic neuron are  
413 often clustered (Kasthuri et al., 2015; Lee et al., 2016). Our model interprets synaptic  
414 clustering as a result of an experience-dependent resampling process by synaptic rewiring,  
415 and predicts that synaptic connections are less clustered in immature animal. In addition,  
416 although the model does not provide direct insights on dendritic clustering of inputs from  
417 different presynaptic neurons (Takahashi et al., 2012), our results indicate that if two  
418 presynaptic inputs are tightly correlated with each other, these presynaptic neurons are  
419 more likely to make synaptic contacts on similar positions on the dendritic tree.

420 Our result also suggests that position on the dendritic tree acts as a prior of the  
421 expected total connection strength, and supports rapid acquisition of desired synaptic  
422 weights. (Fig. 4A). For instance, primary inputs to the postsynaptic neuron should be  
423 proximal, since these inputs are typically expected to have stronger impacts on the soma  
424 than modulatory inputs. This is consistent with the synaptic organization on the dendrite of  
425 pyramidal cell where primary inputs are often projected to proximal dendrite, while  
426 modulatory inputs are typically more distal (Bittner et al., 2015; Manita et al., 2015).

427 Anti-Hebbian plasticity at distal synapse (Letzkus et al., 2006; Sjöström and  
428 Häusser, 2006) can be interpreted in a similar way. Modulatory inputs are typically not  
429 tightly correlated with the output spike trains, because these inputs usually carry contextual  
430 information (Bittner et al., 2015), or delayed feedback signals (Manita et al., 2015). Hence,  
431 anti-Hebbian plasticity at distal synapse potentially helps neurons to select appropriate  
432 modulatory inputs.



### 433 *Related works*

434 Previous theoretical studies often explain synaptic plasticity as stochastic gradient descent  
435 on some objective functions (Pfister et al., 2006; Nessler et al., 2013; Urbanczik and Senn,  
436 2014; Hiratani and Fukai, 2016), but these models require fine-tuning of the learning rate  
437 for explaining near-optimal learning performance observed in humans (Behrens et al.,  
438 2007; Lake et al., 2015) and rats (Madarasz et al., 2016), unlike our model. Moreover, in this  
439 study, we proposed synaptic dynamics during learning as a sample-based inference process,  
440 in contrast to previous studies in which sample-based interpretations were applied for  
441 neural dynamics (Orbán et al., 2016).

442 On the anti-Hebbian plasticity at distal synapse, previous modeling studies have  
443 revealed its potential phenomenological origins (Graupner and Brunel, 2012), but its  
444 functional benefits, especially optimality, have not been well investigated before. Particle  
445 filtering is an established method in machine learning (Doucet et al., 2000), and has been  
446 applied to artificial neural networks (Freitas et al., 2000), yet its biological correspondence  
447 had been elusive.

448 Previous computational studies on dendritic computation have been emphasizing  
449 the importance of active dendritic process (Segev and London, 2000), especially for  
450 performing inference from correlated inputs (Ujfalussy et al., 2015), or for computation at  
451 terminal tufts of cortical layer 5 or CA1 neurons (Urbanczik and Senn, 2014). Nevertheless,  
452 experimental studies suggest the summation of excitatory input through dendritic tree is  
453 approximately linear (Cash and Yuste, 1999; Hao et al., 2009). Indeed, we have shown that a  
454 linear summation of synaptic inputs is suitable for implementing importance sampling.  
455 Moreover, we have demonstrated that even in a detailed neuron model with active dendrites,  
456 a learning rule assuming a linear synaptic summation works well.

457

### 458 **Author Contributions**

459 NH and TF conceived the study, NH designed and performed the modeling, NH and TF wrote  
460 the manuscript.

461

462

463 **Acknowledgements**

464 The authors thank to Peter Latham for discussions and comments on the manuscript. This  
465 work was partly supported by CREST, JST (JPMJCR13W1 to TF) and Grants-in-Aid for  
466 Scientific Research (KAKENHI) from MEXT (no 15H04265 and 16H01289 to TF).

467

468 **References**

469 Aitchison, L., and Latham, P.E. (2014). Bayesian synaptic plasticity makes predictions about  
470 plasticity experiments in vivo. ArXiv14101029 Q-Bio.

471 Amari, S., Park, H., and Ozeki, T. (2006). Singularities Affect Dynamics of Learning in  
472 Neuromanifolds. *Neural Comput.* *18*, 1007–1065.

473 Bartol, T.M., Bromer, C., Kinney, J.P., Chirillo, M.A., Bourne, J.N., Harris, K.M., and  
474 Sejnowski, T.J. (2015). Nanoconnectomic upper bound on the variability of synaptic  
475 plasticity. *eLife* e10778.

476 Behrens, T.E.J., Woolrich, M.W., Walton, M.E., and Rushworth, M.F.S. (2007). Learning the  
477 value of information in an uncertain world. *Nat. Neurosci.* *10*, 1214–1221.

478 Bittner, K.C., Grienberger, C., Vaidya, S.P., Milstein, A.D., Macklin, J.J., Suh, J., Tonegawa, S.,  
479 and Magee, J.C. (2015). Conjunctive input processing drives feature selectivity in  
480 hippocampal CA1 neurons. *Nat. Neurosci.* *18*, 1133–1142.

481 Cash, S., and Yuste, R. (1999). Linear Summation of Excitatory Inputs by CA1 Pyramidal  
482 Neurons. *Neuron* *22*, 383–394.

483 Churchland, A.K., Kiani, R., Chaudhuri, R., Wang, X.-J., Pouget, A., and Shadlen, M.N.  
484 (2011). Variance as a Signature of Neural Computations during Decision Making. *Neuron*  
485 *69*, 818–831.

486 Deuchars, J., West, D.C., and Thomson, A.M. (1994). Relationships between morphology  
487 and physiology of pyramid–pyramid single axon connections in rat neocortex in vitro. *J.*  
488 *Physiol.* *478*, 423–435.

489 Doucet, A., Godsill, S., and Andrieu, C. (2000). On sequential Monte Carlo sampling  
490 methods for Bayesian filtering. *Stat. Comput.* *10*, 197–208.

491 Everett, B. (2013). *An Introduction to Latent Variable Models* (Springer Science & Business  
492 Media).

- 493 Feldmeyer, D., Egger, V., Lübke, J., and Sakmann, B. (1999). Reliable synaptic connections  
494 between pairs of excitatory layer 4 neurones within a single “barrel” of developing rat  
495 somatosensory cortex. *J. Physiol.* *521*, 169–190.
- 496 Freitas, J.F.G. de, Niranjana, M., Gee, A.H., and Doucet, A. (2000). Sequential Monte Carlo  
497 Methods to Train Neural Network Models. *Neural Comput.* *12*, 955–993.
- 498 Graupner, M., and Brunel, N. (2012). Calcium-based plasticity model explains sensitivity of  
499 synaptic changes to spike pattern, rate, and dendritic location. *Proc. Natl. Acad. Sci.* *109*,  
500 3991–3996.
- 501 Gütig, R. (2016). Spiking neurons can discover predictive features by aggregate-label  
502 learning. *Science* *351*, aab4113.
- 503 Hao, J., Wang, X., Dan, Y., Poo, M., and Zhang, X. (2009). An arithmetic rule for spatial  
504 summation of excitatory and inhibitory inputs in pyramidal neurons. *Proc. Natl. Acad. Sci.*  
505 *106*, 21906–21911.
- 506 Hines, M.L., and Carnevale, N.T. (1997). The NEURON Simulation Environment. *Neural*  
507 *Comput.* *9*, 1179–1209.
- 508 Hiratani, N., and Fukai, T. (2016). Hebbian Wiring Plasticity Generates Efficient Network  
509 Structures for Robust Inference with Synaptic Weight Plasticity. *Front. Neural Circuits* *10*,  
510 41.
- 511 Holtmaat, A., and Svoboda, K. (2009). Experience-dependent structural synaptic plasticity  
512 in the mammalian brain. *Nat. Rev. Neurosci.* *10*, 647–658.
- 513 Kasthuri, N., Hayworth, K.J., Berger, D.R., Schalek, R.L., Conchello, et al., 2015. Saturated  
514 Reconstruction of a Volume of Neocortex. *Cell* *162*, 648–661.  
515 doi:10.1016/j.cell.2015.06.054
- 516 Knill, D.C., and Pouget, A. (2004). The Bayesian brain: the role of uncertainty in neural  
517 coding and computation. *Trends Neurosci.* *27*, 712–719.
- 518 Körding, K.P., and Wolpert, D.M. (2006). Bayesian decision theory in sensorimotor control.  
519 *Trends Cogn. Sci.* *10*, 319–326.
- 520 Lake, B.M., Salakhutdinov, R., and Tenenbaum, J.B. (2015). Human-level concept learning  
521 through probabilistic program induction. *Science* *350*, 1332–1338.
- 522 Lee, W.-C.A., Bonin, V., Reed, M., Graham, B.J., Hood, G., Glattfelder, K., and Reid, R.C.

- 523 (2016). Anatomy and function of an excitatory network in the visual cortex. *Nature* 532,  
524 370–374.
- 525 Letzkus, J.J., Kampa, B.M., and Stuart, G.J. (2006). Learning Rules for Spike  
526 Timing–Dependent Plasticity Depend on Dendritic Synapse Location. *J. Neurosci.* 26,  
527 10420–10429.
- 528 Madarasz, T.J., Diaz–Mataix, L., Akhand, O., Ycu, E.A., LeDoux, J.E., and Johansen, J.P.  
529 (2016). Evaluation of ambiguous associations in the amygdala by learning the structure  
530 of the environment. *Nat. Neurosci.* 19, 965–972.
- 531 Manita, S., Suzuki, T., Homma, C., Matsumoto, T., Odagawa, M., Yamada, K., Ota, K.,  
532 Matsubara, C., Inutsuka, A., Sato, M., et al. (2015). A Top–Down Cortical Circuit for  
533 Accurate Sensory Perception. *Neuron* 86, 1304–1316.
- 534 Markram, H., Lübke, J., Frotscher, M., Roth, A., and Sakmann, B. (1997). Physiology and  
535 anatomy of synaptic connections between thick tufted pyramidal neurones in the  
536 developing rat neocortex. *J. Physiol.* 500, 409–440.
- 537 Markram, H., Muller, E., Ramaswamy, S., Reimann, M.W., Abdellah, M., et al., 2015.  
538 Reconstruction and Simulation of Neocortical Microcircuitry. *Cell* 163, 456–492.  
539 doi:10.1016/j.cell.2015.09.029
- 540 Matsuzaki, M., Honkura, N., Ellis–Davies, G.C.R., and Kasai, H. (2004). Structural basis of  
541 long–term potentiation in single dendritic spines. *Nature* 429, 761–766.
- 542 Mongillo, G., and Deneve, S. (2008). Online Learning with Hidden Markov Models. *Neural*  
543 *Comput.* 20, 1706–1716.
- 544 Nessler, B., Pfeiffer, M., Buesing, L., and Maass, W. (2013). Bayesian Computation Emerges  
545 in Generic Cortical Microcircuits through Spike–Timing–Dependent Plasticity. *PLoS*  
546 *Comput Biol* 9, e1003037.
- 547 Orbán, G., Berkes, P., Fiser, J., and Lengyel, M. (2016). Neural Variability and  
548 Sampling–Based Probabilistic Representations in the Visual Cortex. *Neuron* 92, 530–543.
- 549 Pfister, J.–P., Toyoizumi, T., Barber, D., and Gerstner, W. (2006). Optimal  
550 Spike–Timing–Dependent Plasticity for Precise Action Potential Firing in Supervised  
551 Learning. *Neural Comput.* 18, 1318–1348.
- 552 Rabiner, L. (1989). A tutorial on hidden Markov models and selected applications in speech

- 553 recognition. *Proc. IEEE* *77*, 257–286.
- 554 Rigotti, M., Barak, O., Warden, M.R., Wang, X.-J., Daw, N.D., Miller, E.K., and Fusi, S. (2013).  
555 The importance of mixed selectivity in complex cognitive tasks. *Nature* *497*, 585–590.
- 556 Robert, C., and Casella, G. (2013). *Monte Carlo Statistical Methods* (Springer Science &  
557 Business Media).
- 558 Segev, I., and London, M. (2000). Untangling Dendrites with Quantitative Models. *Science*  
559 *290*, 744–750.
- 560 Sjöström, P.J., and Häusser, M. (2006). A Cooperative Switch Determines the Sign of  
561 Synaptic Plasticity in Distal Dendrites of Neocortical Pyramidal Neurons. *Neuron* *51*, 227–  
562 238.
- 563 Smith, S.L., Smith, I.T., Branco, T., and Häusser, M. (2013). Dendritic spikes enhance  
564 stimulus selectivity in cortical neurons in vivo. *Nature* *503*, 115–120.
- 565 Soltani, A., and Wang, X.-J. (2010). Synaptic computation underlying probabilistic inference.  
566 *Nat. Neurosci.* *13*, 112–119.
- 567 Staras, K., Branco, T., Burden, J.J., Pozo, K., Darcy, K., Marra, V., Ratnayaka, A., and Goda, Y.  
568 (2010). A Vesicle Superpool Spans Multiple Presynaptic Terminals in Hippocampal  
569 Neurons. *Neuron* *66*, 37–44.
- 570 Stuart, G., and Spruston, N. (1998). Determinants of Voltage Attenuation in Neocortical  
571 Pyramidal Neuron Dendrites. *J. Neurosci.* *18*, 3501–3510.
- 572 Takahashi, N., Kitamura, K., Matsuo, N., Mayford, M., Kano, M., Matsuki, N., and Ikegaya, Y.  
573 (2012). Locally Synchronized Synaptic Inputs. *Science* *335*, 353–356.
- 574 Tsubo, Y., Isomura, Y., and Fukai, T. (2012). Power–Law Inter–Spike Interval Distributions  
575 Infer a Conditional Maximization of Entropy in Cortical Neurons. *PLOS Comput Biol* *8*,  
576 e1002461.
- 577 Ujfalussy, B.B., Makara, J.K., Branco, T., and Lengyel, M. (2015). Dendritic nonlinearities are  
578 tuned for efficient spike–based computations in cortical circuits. *eLife* e10056.
- 579 Urbanczik, R., and Senn, W. (2014). Learning by the Dendritic Prediction of Somatic Spiking.  
580 *Neuron* *81*, 521–528.
- 581 Watanabe, S. (2001). Algebraic Analysis for Nonidentifiable Learning Machines. *Neural*  
582 *Comput.* *13*, 899–933.

- 583 Williams, S.R., and Stuart, G.J. (2003). Role of dendritic synapse location in the control of  
584 action potential output. *Trends Neurosci.* 26, 147–154.
- 585 Xu, T., Yu, X., Perlik, A.J., Tobin, W.F., Zweig, J.A., Tennant, K., Jones, T., and Zuo, Y. (2009).  
586 Rapid formation and selective stabilization of synapses for enduring motor memories.  
587 *Nature* 462, 915–919.
- 588 Yang, G., Pan, F., and Gan, W.–B. (2009). Stably maintained dendritic spines are associated  
589 with lifelong memories. *Nature* 462, 920–924.
- 590
- 591

592 **Methods**

593 ***A conceptual model of multisynaptic learning***

594 ***The learning rule for multisynaptic connections***

595 In the model, tone stimulus and electric shock were represented by binary variables  
 596  $x_n \in \{0,1\}$  and  $y_n \in \{0,1\}$ . At each trial  $n$ , tone was delivered with  $\Pr[x_n=1]=\pi_x$ , and electric  
 597 shock was given only when  $x_n=1$ , with probability  $\Pr[y_n=1|x_n=1]=v_c$ . For this task, the  
 598 update rule for the spine size factor  $g_k^{n+1} = \frac{1}{Kq_v(v_k)} p(v_c = v_k | x_{t_{n+1}}, y_{t_{n+1}})$  is given as,

$$\begin{aligned} g_k^{n+1} &= \frac{1}{Kq_v(v_k)} p(v_c = v_k | x_{t_{n+1}}, y_{t_{n+1}}) \\ &\propto \frac{1}{Kq_v(v_k)} p(x_{n+1}, y_{n+1} | v_c = v_k) p(v_c = v_k | x_{t_n}, y_{t_n}) \\ 599 &\propto p(y_{n+1} | x_{n+1}, v_c = v_k) \left( \frac{1}{Kq_v(v_k)} p(v_c = v_k | x_{t_n}, y_{t_n}) \right) \\ &= p(y_{n+1} | x_{n+1}, v_c = v_k) g_k^n. \end{aligned}$$

600 In particular, in our problem setting,  $v_c$  does not provide any information about  $y_n$  when  
 601  $x_n=0$ , thus approximately (see Supplementary Information for the proof of convergence),

$$\begin{aligned} 602 \quad p(y_{n+1} | x_{n+1}, v_c = v_k) &\approx x_{n+1} [v_k y_{n+1} + (1-v_k)(1-y_{n+1})] + \frac{1}{2}(1-x_{n+1}) \\ &\propto 1 + (2v_k - 1)x_{n+1}(2y_{n+1} - 1). \end{aligned}$$

603 Because the normalization factor is determined by

$$604 \quad 1 = \int p(v'_c | x_{t_n}, y_{t_n}) dv'_c \approx \frac{1}{K} \sum_k \frac{p(v'_c = v_k | x_{t_n}, y_{t_n})}{q_v(v_k)} = \sum_k g_k^n,$$

605 the sum of  $\{g_k^{n+1}\}$  should also be normalized to 1. Thus the update rule is given as

$$606 \quad g_k^{n+1} = \frac{[1 + f(x_{n+1}, y_{n+1}; v_k)] g_k^n}{\sum_{k'} [1 + f(x_{n+1}, y_{n+1}; v_{k'})] g_{k'}^n} = \frac{1 + f(x_{n+1}, y_{n+1}; v_k)}{1 + f(x_{n+1}, y_{n+1}; w^n)} g_k^n,$$

607 where  $f(x, y; v) \equiv (2v - 1)x(2y - 1)$  and  $w^n \equiv \sum_k w_k^n = \sum_k g_k^n v_k$ . As for the resampling process, at  
 608 every trial  $n$ , if spine  $k$  satisfied  $g_k < g_{th}$ , unit EPSP was resampled uniformly from  $[0, 1)$ , and  
 609 the spine size was set at  $g_k = g_{th}$ .

610

611 ***Monosynaptic learning rule***

612 For comparison, we implemented a monosynaptic learning rule, by expanding the  
 613 exact solution  $\bar{v}_c^n = \sum_{n'} x_{n'} y_{n'} / \sum_{n'} x_{n'}$  as

$$614 \quad \bar{v}_c^n = \left( x_n y_n + \sum_{n'=1}^{n-1} x_{n'} y_{n'} \right) / \left( x_n + \sum_{n'=1}^{n-1} x_{n'} \right) \approx \bar{v}_c^{n-1} \left( 1 + x_n (y_n - \bar{v}_c^{n-1}) / \sum_{n'=1}^{n-1} x_{n'} y_{n'} \right).$$

615 Hence, by using a single variable  $v_{rm}^n$ , the learning rule is given as  $v_{rm}^n = v_{rm}^{n-1} \left( 1 + \eta x_n (y_n - \bar{v}_{rm}^{n-1}) \right)$ ,

616 where  $\eta$  represents the learning rate (Nessler et al., 2013).

617

### 618 Details of the conceptual model

619 In the simulations, we used  $\pi_x=0.3$ , and  $v_c$  was randomly chosen from [0,1)  
620 uniformly at each simulation (not at each trial). The number of connections was kept at  
621  $K=100$  except for Figure 2B in which  $K=2$  to 1000 were used. Initial value of  $k$ -th connection  
622  $v_k$  was set as  $v_k=k/K$  except for Figure 2C in which the initial distribution was biased by  
623 choosing  $v_k$  as  $v_k = -\log(1 - [1 - e^{-\lambda_B}] \frac{k}{K})$  where  $\lambda_B$  is the bias parameter. Resampling was  
624 performed with the threshold  $g_{th}=0.0001$ , and a new unit EPSP  $v_k$  was uniformly sampled  
625 from [0,1).

626

### 627 **Detailed single neuron model**

#### 628 Morphology

629 We constructed a detailed neuron model based on a model of layer 2/3 pyramidal neuron  
630 with active dendrites (Smith et al., 2013) using NEURON simulator (Hines and Carnevale,  
631 1997). We distributed 500 excitatory synaptic inputs from 50 presynaptic neurons randomly  
632 on the dendrite. Synaptic input was modeled as a double exponential conductance change  
633 with the rise time  $\tau_{rise}=0.5$ ms and the decay time  $\tau_{decay}=2.5$ ms. For each synapse  $k$  from  
634 presynaptic neuron  $j$ , we first applied a synaptic input with a constant weight factor  
635  $\gamma_g=1.5$ nS, and then determined the unit EPSP  $v_j^k$  of synapse  $k$  by measuring somatic  
636 membrane potential change. In the simulation of the task, using malleable spine size factor  
637  $g_j^k$ , we set the weight factor of synapse  $k$  as  $\gamma_g g_j^k$ .

638

#### 639 Classification task

640 Using this neuron model, we considered learning of pattern classification. In  
641 particular, here we defined the problem as an acquisition of a latent variable model (Everett,  
642 2013). We first constructed a discrete latent variable model  $p(y^t) = \sum_{j=1}^M p(y^t | x^t = x_j) p(x^t = x_j)$   
643 where  $x \in \{x_1, \dots, x_M\}$  and  $y \in \{0,1\}$  represent the input and the output variable,  $M$  is the total  
644 number of presynaptic neurons, and  $t$  represents trial number. Suppose the firing rate of



645 presynaptic neurons  $r_j^t$  represent  $p(x^t=x_j)$ , and the total synaptic weight from presynaptic  
 646 neuron  $j$  satisfies  $w_j \propto p(y=1|x=x_j)$ , then dendritic summation over all presynaptic inputs  
 647 naturally reflects the probability  $p(y^t=1)$  (i.e.  $\sum_j w_j r_j^t \propto p(y^t=1)$ ). Let us define the true latent  
 648 model (or the target of learning) as  $w_j^{trg} \equiv p(y=1|x=x_j)$ , and the distribution of the hidden  
 649 variable  $x$  at trial  $t$  (i.e. the firing rate distribution of input neurons at trial  $t$ ) as  $\rho_j^t \equiv p(x^t=x_j)$ .

650 In this configuration, the task can be defined as the acquisition of the target model  
 651  $\{w_j^{trg}\}$  from presynaptic spikes generated from  $\{\rho_j^t\}$  and the stochastic teaching signal  $y^t$   
 652 given by  $\Pr[y^t=1] = \sum_{j=1}^M w_j^{trg} \rho_j^t$ . When input signal  $\{\rho_j^t\}$  is generated from the target model  
 653  $\{w_j^{trg}\}$  as  $\rho_j^t \propto w_j^{trg}$ , the probability  $\Pr[y^t=1]$  typically takes a large value, while the probability  
 654 becomes small if  $\{\rho_j^t\}$  is randomly generated. Thus, we can evaluate learning performance by  
 655 considering the classification of inputs generated by the target distribution from those  
 656 generated by other distributions (i.e. distractors), through observation of somatic  
 657 membrane dynamics. In the simulation, we first performed training of synaptic weights by  
 658 presenting stimuli generated from both the target and the distractors with corresponding  
 659 stochastic supervised signals. Then, evaluated the performance by comparing the somatic  
 660 responses for the target stimuli and the distractors.

661

### 662 The learning rule for the detailed model

663 We next derived the multisynaptic learning rule for this task. By Bayesian filtering,  
 664  $p(w_j^{trg} = w_j^k | y^{tt}, \rho_j^{tt}) \propto p(y^t, \rho_j^t | w_j^{trg} = w_j^k, y^{tt-1}, \rho_j^{tt-1}) p(w_j^{trg} = w_j^k | y^{tt-1}, \rho_j^{tt-1})$ .

665 Because  $\rho_j^t$  does not depend on  $w_j^{trg}$  nor previous activities  $\{y^{1:t-1}, \rho_j^{1:t-1}\}$ ,

$$666 \quad p(y^t, \rho_j^t | w_j^{trg} = w_j^k, y^{tt-1}, \rho_j^{tt-1}) \propto p(y^t | w_j^{trg} = w_j^k, \rho_j^t, y^{tt-1}, \rho_j^{tt-1}) \quad (3)$$

$$\equiv y^t [\bar{w} + (w_j^k - \bar{w}) \rho_j^t] + (1 - y^t) [(1 - \bar{w}) - (w_j^k - \bar{w}) \rho_j^t],$$

667 where  $\bar{w} = \langle w_j^{trg} \rangle_j$ . In the neuronal implementation, presynaptic activities are not directly  
 668 given as the firing rates  $\rho_j^t \equiv p(x^t=x_j)$ , but given as spike trains, yet we can still apply this rule  
 669 by approximating  $\rho_j^t$  by the spike count  $s_j^t$  as  $\rho_j^t \approx s_j^t/A_p$ , with amplification factor  $A_p$ . More  
 670 specifically, we have chosen the factor  $A_p$  as  $A_p = 0.2M$ , so that each presynaptic neuron  
 671 emits 0.2 spikes in each trial on average. Similarly, representation of  $w_j^k$  by unit EPSP of the

672  $k$ -th synapse  $v_j^k$  can be implemented as  $w_j^k = \gamma_v (v_j^k - v_{\min})$ . In the model,  $v_{\min}$  was set at  
 673 0.41mV (Fig. 3B), and  $\gamma_v$  was defined as  $\gamma_v \equiv 1/(v_{\max} - v_{\min})$  where  $v_{\max} = 1.45$ mV. Thus, by  
 674 representing the importance of each sample by the spine size factor as  
 675  $g_j^{k,t} = \rho(w_j^{tg} = \gamma_v (v_j^k - v_{\min}) | y^{tt}, \rho_j^{tt}) / Kq_v(v_j^k)$ , from Equation (3), the learning rule of  $\{g_j^{k,t}\}$  is  
 676 approximately given

$$677 \quad g_j^{k,t+1} = \begin{cases} (\bar{w}^t + [\gamma_v (v_j^k - v_{\min}) - \bar{w}^t] s_j^t / A_p) g_j^{k,t} / Z_j^t & (\text{if } y^t = 1) \\ ([1 - \bar{w}^t] - [\gamma_v (v_j^k - v_{\min}) - \bar{w}^t] s_j^t / A_p) g_j^{k,t} / Z_j^t & (\text{if } y^t = 0), \end{cases}$$

678 where

$$679 \quad Z_j^t = \begin{cases} (\bar{w}^t + [\gamma_v (\bar{v}_j^t - v_{\min}) - \bar{w}^t] s_j^t / A_p) & (\text{if } y^t = 1) \\ ([1 - \bar{w}^t] - [\gamma_v (\bar{v}_j^t - v_{\min}) - \bar{w}^t] s_j^t / A_p) & (\text{if } y^t = 0). \end{cases}$$

680 Mean values  $\{\bar{v}_j^t\}$  and  $\bar{w}^t$  were estimated as  $\bar{v}_j^t = \sum_{k=1}^K g_j^{k,t} v_j^k$  and  $\bar{w}^t = \sum_{j=1}^M \gamma_v (\bar{v}_j^t - v_{\min}) / M$ .

681

### 682 Input configuration

683 In the simulations, we first constructed the mean presynaptic spike probabilities  
 684  $\{\rho_j\}$  for target and distractor stimuli, and then generated input spike trains  $\{s_j^t\}$  according to  
 685  $\{\rho_j\}$ . Mean spike probabilities  $\{\rho_j^{trg}\}$  for the target stimulus were randomly generated from a  
 686 Beta distribution as  $\rho_j^{trg} = \tilde{\rho}_j^{trg} / Z_{trg}$  where  $\tilde{\rho}_j^{trg} \leftarrow \text{Beta}(\alpha_B, 1)$  and  $Z_{trg} = (\alpha_B + 1) \sum_{j=1}^M \tilde{\rho}_j^{trg} / M \alpha_B$ , with  $\alpha_B$   
 687 being the sparseness parameter. Here, Beta distributions were used due to the constraint on  
 688  $\{\rho_j^{trg}\}$  ( $0 \leq \rho_j^{trg} < 1$ ). Mean responses for the distractors  $\{\rho_j^{dst,\mu}\}$  ( $\mu = 1, \dots, 10$ ) were defined in the  
 689 same way. Based on these models, we generated presynaptic spikes  $\{s_j^t\}$  with a doubly  
 690 stochastic process to reproduce high variability typically observed in cortical activity  
 691 (Churchland et al., 2011; Tsubo et al., 2012). In trial  $t$  with the target stimulus, we  
 692 determined the number of spikes  $s_j^t$  emitted from presynaptic neuron  $j$  as  $s_j^t = \lfloor A_p \rho_j^t + \zeta \rfloor$   
 693 where  $\rho_j^t = \tilde{\rho}_j^t / \sum_j \tilde{\rho}_j^t$ ,  $\tilde{\rho}_j^t \leftarrow \text{Gamma}(\rho_j^{trg}, 1)$ ,  $\zeta$  is a random variable uniformly sampled from  
 694  $[0, 1)$ , and  $\lfloor x \rfloor$  is the largest integer smaller than  $x$ . In a distractor trial, we instead sampled  
 695  $\tilde{\rho}_j^t$  from one of the distractor distributions  $\{\rho_j^{dst,\mu}\}$  as  $\tilde{\rho}_j^t \leftarrow \text{Gamma}(\rho_j^{dst,\mu}, 1)$ , and generated  $\{s_j^t\}$   
 696 from the chosen distribution. In either trial, supervising signal  $y^t$  was stochastically given

697 with probability  $\Pr[y^t=1]=\sum_{j=1}^M w_j^{trg} \rho_j^t$ . Finally, spike timings of the  $m$ -th spike from  
 698 presynaptic neuron  $j$  at trial  $t$  was determined as  $(0.1\zeta_G^{jt} + m - 1)\Delta t_{stimulus}/s_j^t$  where  
 699  $\Delta t_{stimulus}=10\text{ms}$ , and  $\zeta_G^{jt}$  is a Gaussian random variable.

700 During training phase, the target stimulus  $\{\rho_j^{trg}\}$  were presented in 20% of trials,  
 701 and each distractor  $\{\rho_j^{dst,\mu}\}$  ( $\mu=1,\dots,10$ ) were presented in 8% of trials. In the test phase, we  
 702 provided 200 stimuli, of which 100 stimuli were generated from  $\{\rho_j^{trg}\}$ , and the rest were  
 703 from  $\{\rho_j^{dst,\mu}\}$ . The classification performance was measured by the ratio of target trials in  
 704 which the maximum EPSP height  $\Delta v_n^{trg}$  exceeded the threshold  
 705  $\theta = (m_{trg}/\sigma_{trg}^2 + m_{dst}/\sigma_{dst}^2)/(1/\sigma_{trg}^2 + 1/\sigma_{dst}^2)$ , to the total of 100 trials, where  $m_{trg} = E[\Delta v_n^{trg}]$  and  
 706  $\sigma_{trg}^2 = \text{Var}[\Delta v_n^{trg}]$  were calculated over 100 test stimuli. Although the evaluations were made  
 707 solely on false negatives, we also observed significant decrease of false positives during  
 708 learning (Fig. 3E). In the purple line of Figure 3F, we used the total EPSP area instead of the  
 709 maximum EPSP height for the measurement.

710

### 711 Details of the NEURON simulations

712 Initial values of spine sizes  $\{g_j^k\}$  were chosen such that  $g_j^k \sim 1/q_v(v_j^k)$  is satisfied. To  
 713 this end, we first estimated the unit EPSP distribution  $q_v(v)$  through a sampled-based  
 714 approximation  $q_v(n) \equiv \sum_{i=1}^N \sum_{k=1}^K [n \cdot dv \leq v_j^k < (n+1) \cdot dv]_+ \propto q_v(n \cdot dv \leq v_j^k < (n+1) \cdot dv)$ , and then

715 calculated  $g_j^k$  by  $g_j^k = \frac{1/q_v(n_j^k)}{\sum_k 1/q_v(n_j^k)}$ , where  $n_j^k$  is the integer that satisfies  $n_j^k \cdot dv \leq v_j^k < (n_j^k + 1) \cdot dv$ .

716 In Figure 4A, to generate a biased synaptic distribution, we randomly sampled a position  
 717 from the whole dendritic tree with probability  $(\frac{L'}{L_{max}})^{\lambda_B-1} \cdot (\frac{L'}{L_{max}})^{1-\lambda_B} / 10 \cdot B(\lambda_B, 2-\lambda_B)$ , and added a  
 718 synapse until 500 synapses are created on the dendritic tree. Here,  $L'$  is the distance from  
 719 the soma,  $L_{max}$  is its maximum length,  $\lambda_B$  is the bias parameter, and  $B(x,y)$  is the Beta  
 720 function.

721 In Figures 4B and C, we replicated synaptic noise independent of presynaptic  
 722 activity by introducing a fluctuation term,  $\xi_j^k \leftarrow \text{Gamma}(1/s_{noise}, s_{noise})$ , into the spine-size factor  
 723 as  $\gamma_g g_j^k \rightarrow \gamma_g g_j^k \xi_j^k$ . The threshold for synaptic elimination was set as  $g_{th} = 0.0001$ , and the

724 spine size of the new synapse was initialized at  $g_k = g_{th}$ . In the detailed model, we restricted  
725 the position of newly created synapse within the dendritic branches for which the  
726 presynaptic neuron was initially projected to. Thus, in the presented simulations, one  
727 presynaptic neuron can make synaptic contact with at most on 10 dendritic branches. We  
728 introduced this restriction in order to reproduce limited number of close contacts between  
729 the axons and the dendrite (Markram et al., 1997; Feldmeyer et al., 1999). Further details of  
730 the model are available at ModelDB (<http://modeldb.yale.edu/225075> with access  
731 code "1234").

732

### 733 **Recurrent circuit model**

734 In the model, the hidden Markov model had five states, and the transition probabilities  
735 among them  $a_{\mu\nu} \equiv p(x^t = \nu | x^{t-1} = \mu)$  were defined as  $a_{\mu\nu} = 0.5$  if  $\mu = \nu$ ,  $a_{\mu\nu} = 0.4$  if  $\mu = \nu + 1 \pmod{p}$ ,  
736 and  $a_{\mu\nu} = 0.333$  otherwise. In the latter half of Figure 5E, we instead set as  $a_{\mu\nu} = 0.4$  if  $\mu = \nu - 1$   
737  $\pmod{p}$ . Stochastic observation  $\{y^t\}$  was defined as  
738  $p(y^t | x^t = \mu) = \prod_{i=1}^N p(y_i^t | x^t = \mu) \equiv \prod_{i=1}^N h(y_i^t; b_{i\mu})$  where  $N=30$ , and  $h(y; b)$  is a Bernoulli process with  
739 probability  $b$ . In the simulation, observation matrix  $\{b_{i\mu}\}$  was randomly generated from a  
740 uniform distribution [0.1, 0.9). In Figures 5B and C, both transition matrix  $\{a_{\mu\nu}\}$  and  
741 observation matrix  $\{b_{i\mu}\}$  were learned to compare performance with other learning method,  
742 while in Figures 5D and E, only the transition matrix was acquired by synaptic plasticity. KL  
743 divergence in Figures 5B and C was evaluated as  $\operatorname{argmin}_{perm} \sum_{\mu=1}^p x_{\mu}^{opt} (\log x_{\mu}^{opt} - \log x_{perm(\mu)}^{est})$ , where  $x_{\mu}^{opt}$   
744 is the estimation from the true internal model,  $x_{\mu}^{est}$  is the estimation by each learning  
745 method, and  $perm$  denotes permutation over hidden states. See the Supplementary  
746 Information for the further details of the model.

747

748 **Supplementary Information**

749 *1. Proof of convergence of the learning rule for the conceptual model*

750 The derived learning rule can be rewritten as

751 
$$\log p(v_c = v_k | x_{tn}, y_{tn}) = \sum_{n'} \log[1 + (2v_k - 1)x_{n'}(2y_{n'} - 1)] + \text{const},$$

752 so in order to prove convergence, we need to show that  $\varphi(v) \equiv \langle \log[1 + (2v_k - 1)x_{n'}(2y_{n'} - 1)] \rangle_{n'}$  is

753 maximized at true  $v_c$ . By considering Taylor expansion, the above equation is expanded as

754  $\langle \log(1+z) \rangle = \sum_{m=1}^{\infty} \frac{(-1)^{m+1}}{m} \langle z^m \rangle$ . In this form, the average is calculated as

755 
$$\begin{aligned} \langle ((2v_k - 1)x_{n'}(2y_{n'} - 1))^m \rangle &= (2v_k - 1)^m \langle x_{n'} y_{n'} + (-1)^m x_{n'} (1 - y_{n'}) \rangle \\ &= (2v_k - 1)^m v_c \pi_x + (1 - 2v_k)^m (1 - v_c) \pi_x \end{aligned}$$

756 Note that  $(x_n)^m = x_n$  if  $m > 0$ , because  $x_n = 0$  or  $1$ . Thus, by substituting the above equation into  
757 the Taylor expansion form,

758 
$$\begin{aligned} \varphi(v) &= \pi_x v_c \log[1 + (2v - 1)] + \pi_x (1 - v_c) \log[1 + (1 - 2v)] \\ &= \pi_x [v_c \log v + (1 - v_c) \log(1 - v)] + \text{const}. \end{aligned}$$

759 Therefore,  $\varphi(v)$  is maximized at  $v = v_c$ .

760

761 *2. Details of recurrent circuit model*

762 Let us consider a hidden Markov model in which state  $x^t$  is updated with  $x^t \sim p(x^t | x^{t-1})$ , and  
763 the observation  $y^t$  is given as  $y^t \sim p(y^t | x^t)$ . Here, we denote the total number of hidden state

764 as  $p$ , the number of independent observation as  $N$ , transition probabilities as

765  $p(x^t = \mu | x^{t-1} = \nu) \equiv a_{\mu\nu}$ , and the probabilistic distribution of the observation as

766  $p(y^t | x^t = \mu) = \prod_{i=1}^N p(y_i^t | x^t = \mu) \equiv \prod_{i=1}^N h(y_i^t; b_{i\mu})$ . The objective of the task is to estimate  $A = \{a_{\mu\nu}\}$ ,

767  $B = \{b_{i\mu}\}$ , and  $x^{1:t} = \{x^1, x^2, \dots, x^t\}$  from given observations  $y^{1:t} = \{y^1, y^2, \dots, y^t\}$ . Note that due to

768 symmetry, there are at least  $p!$  numbers of  $\{A, B\}$  which gives the same system with the true

769  $\{A^*, B^*\}$ , and in that sense, the problem is ill-posed. However, it is still possible to acquire

770 one of such  $\{A, B\}$  asymptotically (Rabiner, 1989).

771

772 *2.1 Particle filtering in parameter space*

773 From Bayes rule, inference of  $x^t$  is given as

$$\begin{aligned}
 & \rho(x^t | y^{tt}) \propto \rho(y^t | x^t, y^{tt-1}) \rho(x^t | y^{tt-1}) \\
 774 \quad & = \left( \int \rho(y^t, B | x^t, y^{tt-1}) dB \right) \left( \sum_{x^{t-1}} \int \rho(x^t, x^{t-1}, A | y^{tt-1}) dA \right) \\
 & = \left( \int \rho(y^t | x^t, B) \rho(B | y^{tt-1}) dB \right) \left( \sum_{x^{t-1}} \rho(x^{t-1} | y^{tt-1}) \int \rho(x^t | x^{t-1}, A) \rho(A | y^{tt-1}) dA \right).
 \end{aligned}$$

775 The last line holds because  $x^{t-1}$  and  $A$  are independent given  $y^{t:t-1}$ . Hence, if we denote  
 776  $r_\mu^t \equiv \rho(x^t = \mu | y^{tt})$ , the likelihood  $r_\mu^t$  is given as,

$$\begin{aligned}
 777 \quad r_\mu^t & = \left( \int \rho(B | y^{tt-1}) \prod_i h(y_i^t; b_{i\mu}) dB \right) \left( \sum_{\nu} r_\nu^{t-1} \int \rho(A | y^{tt-1}) a_{\mu\nu} dA \right) \\
 & \approx \prod_i \left( \int \rho(b_{i\mu} | y^{tt-1}) h(y_i^t; b_{i\mu}) db_{i\mu} \right) \left( \sum_{\nu} r_\nu^{t-1} \int \rho(a_{\mu\nu} | y^{tt-1}) a_{\mu\nu} da_{\mu\nu} \right).
 \end{aligned}$$

778 Thus, for the given observation  $y^{1:t}$ , state  $x^t$  can be inferred recurrently. Here, we assumed  
 779 independence of elements of the transition matrix  $A$  as  $\rho(A | y^{tt-1}) \approx \prod_{\mu} \prod_{\nu} \rho(a_{\mu\nu} | y^{tt-1})$   
 780 although they are mutually constrained by a boundary condition  $\sum_{\mu} a_{\mu\nu} = 1$ . Similarly, we  
 781 assumed independence of elements of the observation matrix  $B$ .

782 The integral over  $a_{\mu\nu}$  and  $b_{i\mu}$  are generally not analytically calculable, but still  
 783 approximately attainable by using particle filtering (Freitas et al., 2000). By taking  $K$  samples  
 784  $\{a_{\mu\nu}^k\}$  from a proposed distribution  $q_A(a)$ , and by defining  $\alpha_{\mu\nu}^{k,t} \equiv \rho(a_{\mu\nu}^k | y^{tt}) / K q_A(a_{\mu\nu}^k)$ , the  
 785 integral can be approximated as

$$786 \quad \int \rho(a_{\mu\nu} | y^{tt-1}) a_{\mu\nu} da_{\mu\nu} \approx \sum_{k=1}^K \alpha_{\mu\nu}^{k,t-1} a_{\mu\nu}^k.$$

787 Similarly, by taking samples from a distribution  $q_B(b)$  as  $\{b_{i\mu}^k\} \sim q_B(b)$ , the integration over  $b$   
 788 is approximated as  $\int \rho(b_{i\mu} | y^{tt-1}) h(y_i^t; b_{i\mu}) db_{i\mu} \approx \sum_k \beta_{i\mu}^{k,t-1} h(y_i^t; b_{i\mu}^k)$ , where  $\beta_{i\mu}^{k,t} \equiv \rho(b_{i\mu}^k | y^{tt}) / K q_B(b_{i\mu}^k)$ .  
 789 Therefore, the update rule of  $r_\mu^t$  is given as

$$790 \quad r_\mu^t = \exp \left[ \sum_i J_{i\mu}^t + \log \left( \sum_{\nu} \sum_k w_{\mu\nu}^{k,t-1} r_\nu^{t-1} \right) - I^t \right],$$

791 where  $w_{\mu\nu}^{k,t-1} \equiv \alpha_{\mu\nu}^{k,t-1} a_{\mu\nu}^k$ ,  $J_{i\mu}^t \equiv \log \left[ \sum_k \beta_{i\mu}^{k,t-1} h(y_i^t; b_{i\mu}^k) \right]$ , and  $I^t \equiv \log \left( \sum_{\nu} \exp \left[ \sum_i J_{i\nu}^t + \log \left( \sum_{\rho} \sum_k w_{\nu\rho}^{k,t-1} r_\rho^{t-1} \right) \right] \right)$ .

792 The equation roughly corresponds to the firing dynamics of a recurrent network in which  
 793 each neuron pair is connected with  $K$  number of synapses, assuming  $r_\mu^t$  is the firing rate of  
 794 neuron  $\mu$ ,  $J_{i\mu}^t$  are the feed-forward inputs, and  $I^t$  is the global inhibition.

795 We next consider estimation of the importance weights. Because elements of  
 796 matrix  $A$  are not independent, marginalization over all the other  $\{a_{\mu'\nu'}\}_{(\mu',\nu') \neq (\mu,\nu)}$  is in general

797 necessary to obtain  $p(a_{\mu\nu} | y^{1:t})$  (i.e.  $p(a_{\mu\nu} | y^{tt}) = \int \prod_{(\mu', \nu') \neq (\mu, \nu)} p(A | y^{tt}) da_{\mu' \nu'}$ ). However, if each  $a_{\mu\nu}$  is  
 798 successfully learned under the assumption of independence, constraints over  $\{a_{\mu\nu}\}$  should be  
 799 satisfied naturally. Thus,  $p(a_{\mu\nu} | y^{1:t})$  is calculated as

$$800 \quad p(a_{\mu\nu} | y^{tt}) \propto p(a_{\mu\nu} | y^{tt-1}) \left( 1 + \frac{\rho a_{\mu\nu} - 1}{\rho - 1} r_v^{t-1} (\rho r_\mu^{ft} - 1) \right),$$

801 by using following approximation:

802

$$\begin{aligned} 803 \quad p(a_{\mu\nu} | y^{tt}) &\propto p(a_{\mu\nu} | y^{tt-1}) p(y^t | a_{\mu\nu}, y^{tt-1}) \\ &= p(a_{\mu\nu} | y^{tt-1}) \sum_\lambda \sum_\rho p(y^t | x^t = \rho, y^{tt-1}) p(x^t = \rho | x^{t-1} = \lambda, a_{\mu\nu}, y^{tt-1}) p(x^{t-1} = \lambda | y^{tt-1}) \\ &\approx p(a_{\mu\nu} | y^{tt-1}) \left( \sum_{\lambda \neq \nu} \sum_\rho \frac{1}{\rho} p(y^t | x^t = \rho, y^{tt-1}) p(x^{t-1} = \lambda | y^{tt-1}) \right. \\ &\quad \left. + \sum_{\rho \neq \mu} \frac{1 - a_{\mu\nu}}{\rho - 1} p(y^t | x^t = \rho, y^{tt-1}) p(x^{t-1} = \nu | y^{tt-1}) + a_{\mu\nu} p(y^t | x^t = \rho, y^{tt-1}) p(x^{t-1} = \nu | y^{tt-1}) \right) \\ &\propto p(a_{\mu\nu} | y^{tt-1}) \left( \frac{1 - r_v^{t-1}}{\rho} + \frac{1 - a_{\mu\nu}}{\rho - 1} (1 - r_\mu^{ft}) r_v^{t-1} + r_\mu^{ft} a_{\mu\nu} r_v^{t-1} \right) \\ &\propto p(a_{\mu\nu} | y^{tt-1}) \left( 1 + \frac{\rho a_{\mu\nu} - 1}{\rho - 1} r_v^{t-1} (\rho r_\mu^{ft} - 1) \right), \end{aligned}$$

804 where  $r_\mu^{ft} \equiv p(y^t | x^t = \mu, y^{tt-1}) / \left[ \sum_\rho p(y^t | x^t = \rho, y^{tt-1}) \right]$ . Therefore, the update rule of spine size is  
 805 given as,

$$806 \quad \tilde{\alpha}_{\mu\nu}^{k,t} = \left( 1 + \frac{(\rho a_{\mu\nu}^k - 1) r_v^{t-1} (\rho r_\mu^{ft} - 1)}{\rho - 1} \right) \alpha_{\mu\nu}^{k,t-1}, \quad \alpha_{\mu\nu}^{k,t} = \tilde{\alpha}_{\mu\nu}^{k,t} / \sum_{k'} \tilde{\alpha}_{\mu\nu}^{k',t}.$$

807 By defining the total synaptic weight as  $w_{\mu\nu}^t \equiv \sum_k \alpha_{\mu\nu}^{k,t} a_{\mu\nu}^k$ , this rule can be rewritten as,

$$808 \quad \alpha_{\mu\nu}^{k,t} = \frac{1 + f_a(r_v^{t-1}, r_\mu^{ft}, a_{\mu\nu}^k)}{1 + f_a(r_v^{t-1}, r_\mu^{ft}, w_{\mu\nu}^{t-1})} \alpha_{\mu\nu}^{k,t-1}, \quad f_a(r_{pre}, r_{post}, a^k) \equiv (\rho a^k - 1) r_{pre} (\rho r_{post} - 1) / (\rho - 1).$$

809 Similarly, importance weights  $\{\beta_{i\mu}^{k,t}\}$  of observation matrix  $B$  are derived as

$$810 \quad \tilde{\beta}_{i\mu}^{k,t} \propto \beta_{i\mu}^{k,t-1} \left( 1 + \frac{(h(y_i^t; b_{i\mu}^k) - \bar{h}_i(y_i^t)) (\hat{r}_\mu^t - \pi_\mu)}{\bar{h}_i(y_i^t) \cdot (1 - \pi_\mu)} \right), \quad \beta_{i\mu}^{k,t} = \tilde{\beta}_{i\mu}^{k,t} / \sum_{k'} \tilde{\beta}_{i\mu}^{k',t},$$

811 where  $\pi_\mu \equiv p(x^t = \mu)$ , and  $\bar{h}_i(y_i^t) \equiv p(y^t = y_i^t)$ . Here, for the sparseness constraint, instead of  $r_\mu^t$ ,  
 812 we used a discretized version  $\hat{r}_\mu^t \equiv [\hat{x}^t = \mu]_+$  for the learning rule, where the estimated state  
 813  $\hat{x}^t$  is sampled from a probabilistic distribution  $\{r_\mu^t\}$ .

814

815 *2.2 Online approximation of Baum–Welch formula*

816 For the comparison, we also implemented three different rules. The standard rule for  
817 discrete HMM is Baum–Welch formula(Rabiner, 1989), which is described as

818 
$$a_{\mu v}^{(n)} = \frac{\sum_{t=1}^{T-1} \rho(x^t = v, x^{t+1} = \mu | y^{tT}, \theta^{(n-1)})}{\sum_{t=1}^{T-1} \rho(x^t = v | y^{tT}, \theta^{(n-1)})}, \quad b_{j\mu}^{(n)} = \frac{\sum_{t=1}^{T-1} \rho(x^t = \mu, y_j^t = 1 | y^{tT}, \theta^{(n-1)})}{\sum_{t=1}^{T-1} \rho(x^t = \mu | y^{tT}, \theta^{(n-1)})},$$

819 where  $\theta^{(n)}$  is the set of parameters at  $n$ -th estimation. This standard machine learning  
820 method is an off-line learning rule, meaning that entire observation sequence is required for  
821 each update, thus not suitable for neural implementation.

822 By taking online approximation of the Baum–Welch formula, an online learning rule  
823 is obtained(Mongillo and Deneve, 2008). This rule can be extended to our problem setting  
824 straightforwardly as described below. Let us define

825 
$$\psi_{\mu v}^\lambda \equiv \frac{1}{T} \sum_{t=1}^T P(x^t = \mu, x^{t-1} = v, x^T = \lambda | y^{tT}), \quad \phi_{\mu j}^\lambda \equiv \frac{1}{T} \sum_{t=1}^T [y_j^t = 1]_+ P(x^t = \mu, x^T = \lambda | y^{tT}).$$

826 Because

827 
$$P(x^t = \mu, x^{t-1} = v, x^T = \lambda | y^{tT}) = \sum_{\rho} \gamma_{\lambda\rho}(y^T) P(x^{T-1} = \rho, x^t = \mu, x^{t-1} = v | y^{tT-1}),$$

828 where  $\gamma_{\lambda\rho}(y^T) \equiv \frac{P(y^T | x^T = \lambda) P(x^T = \lambda | x^{T-1} = \rho)}{P(y^T | y^{T-1})}$ ,  $\psi_{\mu v}^\lambda(T)$  satisfies a recursive formula:

829 
$$\psi_{\mu v}^\rho(T) = \sum_{\rho'} \gamma_{\lambda\rho}(y^T) (\psi_{\mu v}^\rho(T-1) + \frac{1}{T} [\delta_{v\rho} \delta_{\mu\lambda} q_\rho(T-1) - \psi_{\mu v}^\rho(T-1)]) \quad \text{with } q_\rho(T-1) \equiv P(x^{T-1} = \rho | y^{T-1}).$$

830 Similarly,  $\phi_{\mu j}^\lambda(T)$  is recursively calculated by

831 
$$\phi_{\mu j}^\lambda(T) = \sum_{\rho} \gamma_{\lambda\rho}(y^T) (\phi_{\mu j}^\rho(T-1) + \frac{1}{T} [[y_j^t = 1]_+ \delta_{\mu\lambda} q_\rho(T-1) - \phi_{\mu j}^\rho(T-1)]).$$

832 In addition,  $\gamma_{\lambda\rho}(y^T)$  and  $q_\rho(T)$  are given as

833 
$$\gamma_{\lambda\rho}(y^T) = \frac{(\prod_j h(y_j^T; b_{j\lambda})) a_{\lambda\rho}}{\sum_{\lambda'} \sum_{\rho'} (\prod_j h(y_j^T; b_{j\lambda'})) a_{\lambda'\rho'} q_{\rho'}(T-1)}, \quad q_\lambda(T) = \sum_{\rho} \gamma_{\lambda\rho}(y^T) q_\rho(T-1).$$

834 Therefore, with a learning rate parameter  $\eta(t)$ , an online EM algorithm is given as

835 
$$\psi_{\mu v}^\rho(T) = \sum_{\rho'} \gamma_{\lambda\rho}(y^T; A(T-1), B(T-1)) (\psi_{\mu v}^\rho(T-1) + \eta(T) [\delta_{v\rho} \delta_{\mu\lambda} q_\rho(T-1) - \psi_{\mu v}^\rho(T-1)]),$$

836 
$$\phi_{\mu j}^\lambda(T) = \sum_{\rho} \gamma_{\lambda\rho}(y^T; A(T-1), B(T-1)) (\phi_{\mu j}^\rho(T-1) + \eta(T) [[y_j^t = 1]_+ \delta_{\mu\lambda} q_\rho(T-1) - \phi_{\mu j}^\rho(T-1)]),$$



$$837 \quad a_{\mu\nu}(T) = \frac{\sum_{\lambda} \psi_{\mu\nu}^{\lambda}(T)}{\sum_{\mu'} \sum_{\lambda} \psi_{\mu\nu}^{\lambda}(T)}, \quad b_{j\mu}(T) = \frac{\sum_{\lambda} \phi_{\mu j}^{\lambda}(T)}{\sum_{\nu'} \sum_{\lambda} \psi_{\mu\nu'}^{\lambda}(T)}.$$

838 In the simulation, we normalized  $\{\psi_{\mu\nu}^{\rho}\}$  and  $\{\phi_{\mu j}^{\lambda}\}$  to ensure stability of learning. To this end,  
839 we introduced auxiliary variables of  $\phi_{\mu j}^{\lambda}(T)$  as

$$840 \quad \bar{\phi}_{\mu j}^{\lambda}(T) = \sum_{\rho} \gamma_{\lambda\rho}(y^T; A(T-1), B(T-1)) \left( \bar{\phi}_{\mu j}^{\rho}(T-1) + \eta(T) \left[ [y_j^t = 0]_{+} \delta_{\mu\lambda} q_{\rho}(T-1) - \bar{\phi}_{\mu j}^{\rho}(T-1) \right] \right).$$

841 Normalization was performed as  $\phi_{\mu\nu}^{\lambda} \leftarrow \phi_{\mu\nu}^{\lambda} / \sum_{\mu', \nu', \lambda'} (\phi_{\mu'\nu'}^{\lambda'} + \bar{\phi}_{\mu'\nu'}^{\lambda'})$ ,  $\bar{\phi}_{\mu\nu}^{\lambda} \leftarrow \bar{\phi}_{\mu\nu}^{\lambda} / \sum_{\mu', \nu', \lambda'} (\phi_{\mu'\nu'}^{\lambda'} + \bar{\phi}_{\mu'\nu'}^{\lambda'})$  and

$$842 \quad \psi_{\mu\nu}^{\rho} \leftarrow \psi_{\mu\nu}^{\rho} / \sum_{\mu', \nu', \rho'} \psi_{\mu'\nu'}^{\rho'}.$$

843

### 844 2.3 Stochastic gradient descent rule

845 In addition to the above learning rules, we implemented a stochastic gradient descent (SGD)  
846 rule by considering gradient descent on the likelihood of input  $y^{1:t}$  as

$$847 \quad \tilde{r}_{\mu}^t = \left( \prod_j h(y_j^t; b_{j\mu}^{t-1}) \right) \left( \sum_{\nu} a_{\mu\nu}^{t-1} r_{\nu}^t \right), \quad r_{\mu}^t = \tilde{r}_{\mu}^t / \sum_{\mu'} \tilde{r}_{\mu'}^t,$$

$$848 \quad a_{\mu\nu}^t = a_{\mu\nu}^{t-1} + \eta_{sgd} (r_{\mu}^t - a_{\mu\nu}^{t-1}) r_{\nu}^{t-1}, \quad b_{j\mu}^t = b_{j\mu}^{t-1} + \eta_{sgd} (y_j^t - b_{j\mu}^{t-1}) r_{\mu}^t.$$

849

### 850 2.4 Details of simulations

851 In the simulation, we set  $p=5$ ,  $N=30$ , and we generated the hidden transition matrix  $\{a_{\mu\nu}\}$  as  
852  $a_{\mu\nu}=0.5$  if  $\mu=\nu$ ,  $a_{\mu\nu}=0.4$  if  $\mu=\nu+1 \pmod{p}$ ,  $a_{\mu\nu}=0.333$  otherwise. Observation matrix was  
853 randomly generated by  $b_{j\mu} = b_{min} + (b_{max} - b_{min}) \zeta_{j\mu}$ , where  $b_{min}=0.1$ ,  $b_{max}=0.9$ , and  $\zeta_{j\mu}$  is a  
854 random variable uniformly sampled from  $[0,1)$ . For the probabilistic distribution  $h(y, b)$ , we  
855 used a Bernoulli distribution with mean  $b$ .

856 In the multisynaptic learning rule, initial values of  $\{a_{\mu\nu}^k\}$  and  $\{b_{j\mu}^k\}$  were uniformly  
857 sampled from  $[0,1)$ , and  $[b_{min}, b_{max})$  respectively. Rewiring of  $\{a_{\mu\nu}^k\}$  and  $\{b_{j\mu}^k\}$  were  
858 performed in the same manner with the thresholds  $\alpha_{th}=10^{-4}$ ,  $\beta_{th}=10^{-6}$ . In Figure 5E, we set  
859 the weight of new spine as  $\alpha_{new}=1.1 \times 10^{-4}$ , and  $\beta_{new}=1.1 \times 10^{-6}$  to avoid repetitive rewiring,  
860 and we additionally defined a threshold for effective connectivity  $\alpha_{eff}=10^{-2}$  to discount silent  
861 synapses.

862 In SGD learning and online EM learning rules, the initial values of estimated

863 parameters  $\{a_{\mu\nu}\}$  and  $\{b_{j\mu}\}$  were uniformly sampled from  $[(1-\Delta a_{init})/p, (1+\Delta a_{init})/p]$  and  
864  $[(1-\Delta b_{init})b_{avg}, (1+\Delta b_{init})b_{avg}]$ , where  $\Delta a_{init} = 0.05$ ,  $\Delta b_{init} = 0.1$  and  $b_{avg} = (b_{max} + b_{min})/2$ . Additionally,  
865 in online EM learning rules,  $\{\psi_{\mu\nu}^p\}$  and  $\{\phi_{\mu j}^\lambda\}$  were initialized with random values uniformly  
866 sampled from  $[0.9b_{avg}/p^2, 1.1b_{avg}/p^2]$  and  $[0.9/p^3, 1.1/p^3]$  respectively.

867

868
